# Supplementary material for: Identifying Predictors of University Students’ Wellbeing during the COVID-19 Pandemic—A Data-Driven Approach
Source: Int J Environ Res Public Health. 2021 Jun 22;18(13):6730. doi: 10.3390/ijerph18136730 (PMC8296899; doi:10.3390/ijerph18136730)
Supplement: Supplementary file 1 [file ijerph-18-06730-s001.zip › ijerph-1229494-supplementary.pdf]

Data Availability Statement: The data presented in this study are available on request from the corresponding author. The data are not publicly available due to privacy.

**Table S1: LASSO Model for Psychological Wellbeing**

| Variables                        | Coefficient |
|----------------------------------|-------------|
| Age                              | 0           |
| Female Sex                       | 0           |
| International Students           | 0           |
| Enrolled in Australia            | 0           |
| Level of Education               |             |
| Undergraduate                    | 0           |
| Undergraduate with Double Degree | 0           |
| Honour                           | 0           |
| Postgraduate                     | 0           |
| Ethnicity                        |             |
| East Asian                       | 0           |
| South Asian                      | 0           |
| Southeast Asian                  | 0           |
| White/European                   | 0           |
| Other                            | 0           |

|                                                                      |              |
|----------------------------------------------------------------------|--------------|
| Living Conditions                                                    |              |
| Live Alone                                                           | 0            |
| Live on campus                                                       | 0            |
| Time Point                                                           |              |
| May                                                                  | 0            |
| July                                                                 | 0            |
| August                                                               | 0            |
| October                                                              | 0            |
| December                                                             | 0            |
| <b>Physical Health Status</b>                                        | <b>3.76</b>  |
| COVID-related Items                                                  |              |
| Worry about being infected                                           | 0            |
| Worry about friends or family being infected                         | 0            |
| Worry about physical health being influenced by Coronavirus          | 0            |
| <b>Worry about mental health being influenced by<br/>Coronavirus</b> | <b>-2.07</b> |
| Worry about having enough money and resources                        | 0            |

|                                                 |   |
|-------------------------------------------------|---|
| Worry about staying safe when leaving the house | 0 |
|-------------------------------------------------|---|

|                           |       |
|---------------------------|-------|
| <b>Restriction Stress</b> | -1.02 |
|---------------------------|-------|

Lifestyle Factors

Time spent outside during last two weeks

|         |   |
|---------|---|
| No days | 0 |
|---------|---|

|                   |   |
|-------------------|---|
| 1-2 days per week | 0 |
|-------------------|---|

|                   |   |
|-------------------|---|
| 3-4 days per week | 0 |
|-------------------|---|

|                   |   |
|-------------------|---|
| 5-6 days per week | 0 |
|-------------------|---|

|          |   |
|----------|---|
| Everyday | 0 |
|----------|---|

|                      |       |
|----------------------|-------|
| <b>Diet Worsened</b> | -0.55 |
|----------------------|-------|

|                                                        |       |
|--------------------------------------------------------|-------|
| <b>Perceived Sufficiency of Distance Communication</b> | -0.45 |
|--------------------------------------------------------|-------|

**Psychological Factors**

|                          |      |
|--------------------------|------|
| <b>Emotional Support</b> | 0.28 |
|--------------------------|------|

|                         |       |
|-------------------------|-------|
| <b>Social Isolation</b> | -0.63 |
|-------------------------|-------|

|                   |      |
|-------------------|------|
| <b>Resilience</b> | 0.82 |
|-------------------|------|

---

Root Mean Square Error (RMSE): 14.85

**Table S2: Summary of COVID-Specific Items**

| Item                                                                                                                                   |
|----------------------------------------------------------------------------------------------------------------------------------------|
| During the last two weeks, have you been worried about... (responses based on 5-Point Likert Scale)                                    |
| being infected?                                                                                                                        |
| friends or family being infected?                                                                                                      |
| your physical health being influenced by Coronavirus/COVID-19?                                                                         |
| having enough money and resources?                                                                                                     |
| staying safe when you leave the house?                                                                                                 |
| During the last two weeks, how stressful have the restrictions on leaving home been for you (responses based on 5-Point Likert Scale)? |
